# Supplementary material for: Mechanical Exfoliation of Expanded Graphite to Graphene-Based Materials and Modification with Palladium Nanoparticles for Hydrogen Storage
Source: Nanomaterials (Basel). 2023 Sep 19;13(18):2588. doi: 10.3390/nano13182588 (PMC10534434; doi:10.3390/nano13182588)
Supplement: Supplementary file 1 [file nanomaterials-13-02588-s001.zip › nanomaterials-2593629-supplementary.pdf]

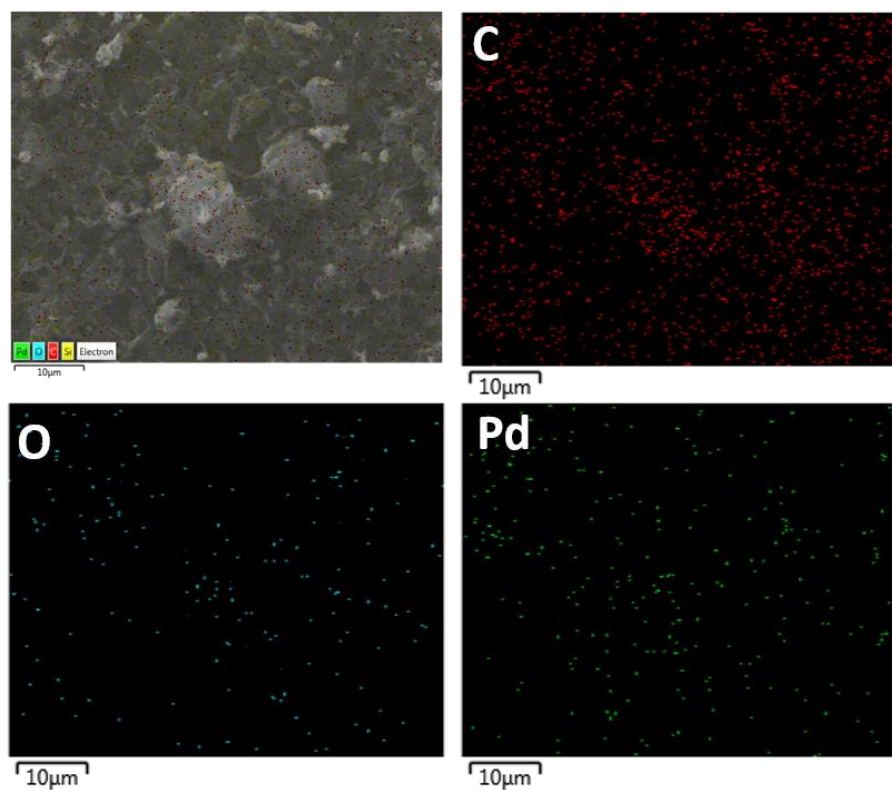

**Figure S1:** EDX element maps of Pd-sEG showing the distribution of carbon, oxygen, and palladium on the nanocomposite.

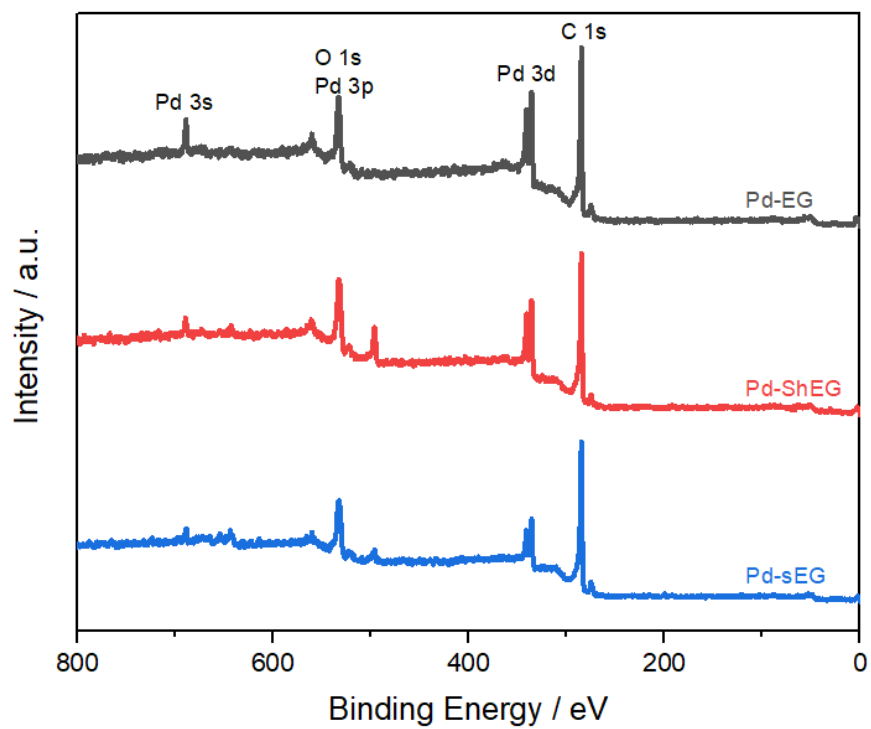

**Figure S2:** XPS survey scans of the Pd functionalized nanocomposites.

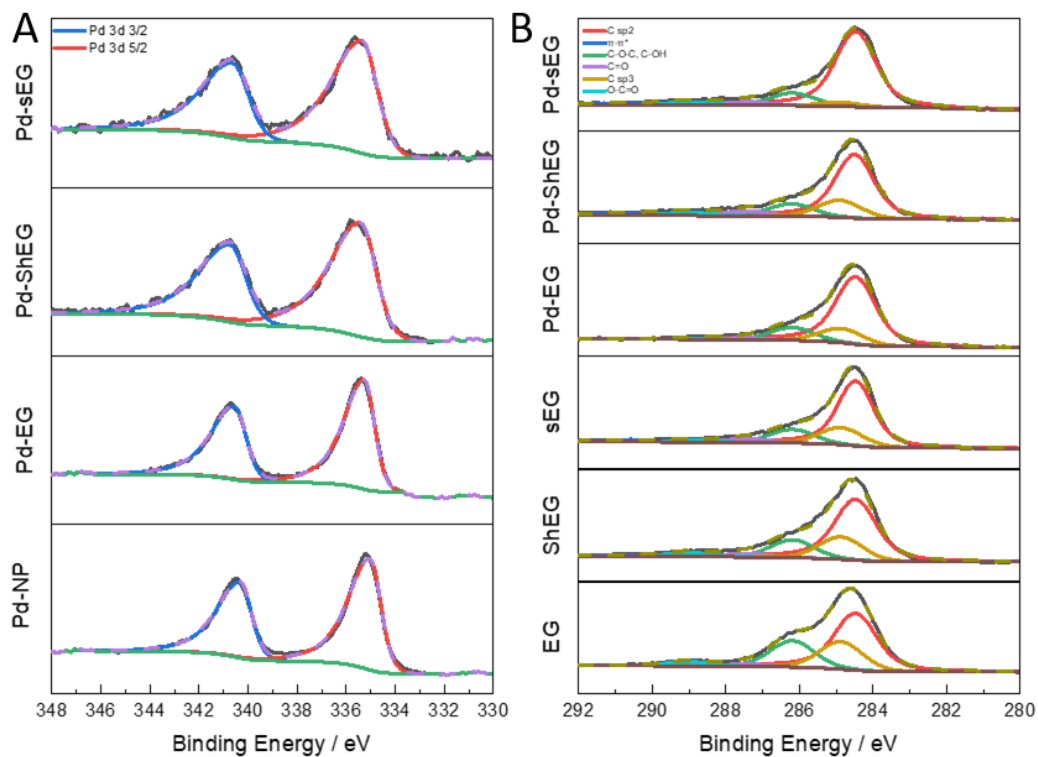

**Figure S3:** A) High resolution XPS scans of Pd 3d of each palladium decorated nanomaterial and B) high resolution XPS scans of each nanomaterial and functionalized nanocomposite.

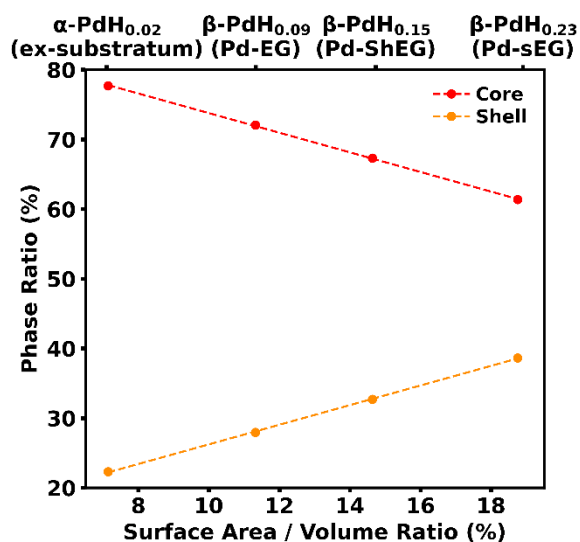

**Figure S4:** Comparison of the PdH<sub>x</sub> nanoparticle core-shell phase fractions and the particle surface area to volume ratio. Both core and shell phase fractions are found to be proportional to the nanoparticle surface area to volume ratios.

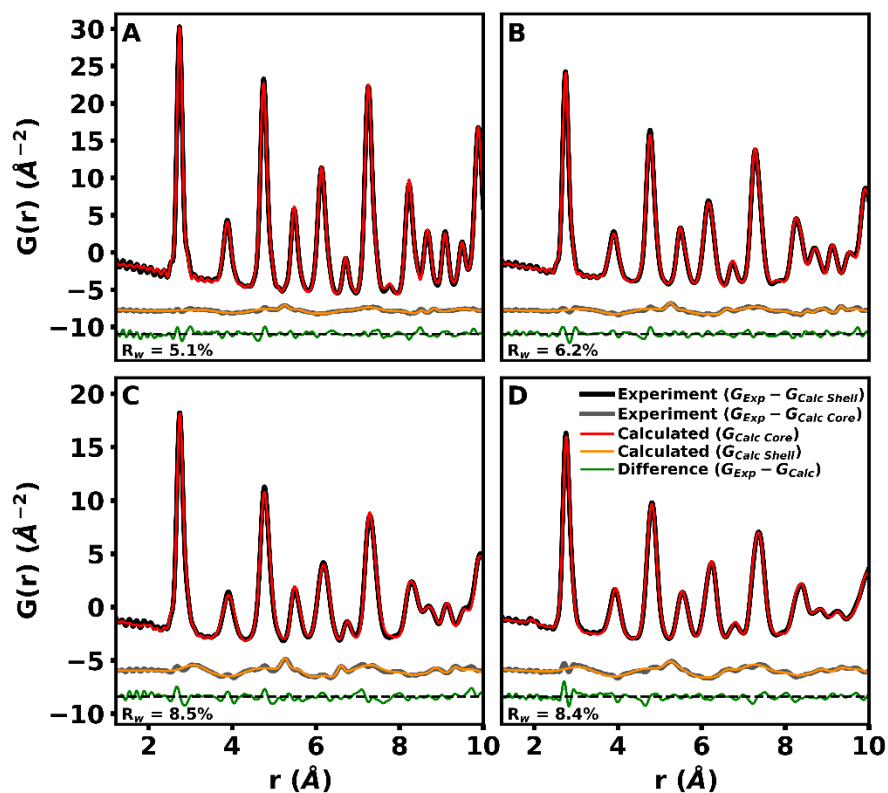

**Figure S5:** Experimental  $G(r)$ 's of the remaining Pd structures after subtraction of the substrates A) ex-substratum, B) EG, C) ShEG and D) sEG. The experimental  $G(r)$ 's are fit to a theoretical core-shell model using a nanocrystalline  $\text{PdH}_x$  pseudo-hexagonal core and a disordered  $\text{PdH}_x$  pseudo-hexagonal outer shell. The core and shell components are separated, and the total model error is split between each component by phase concentration.

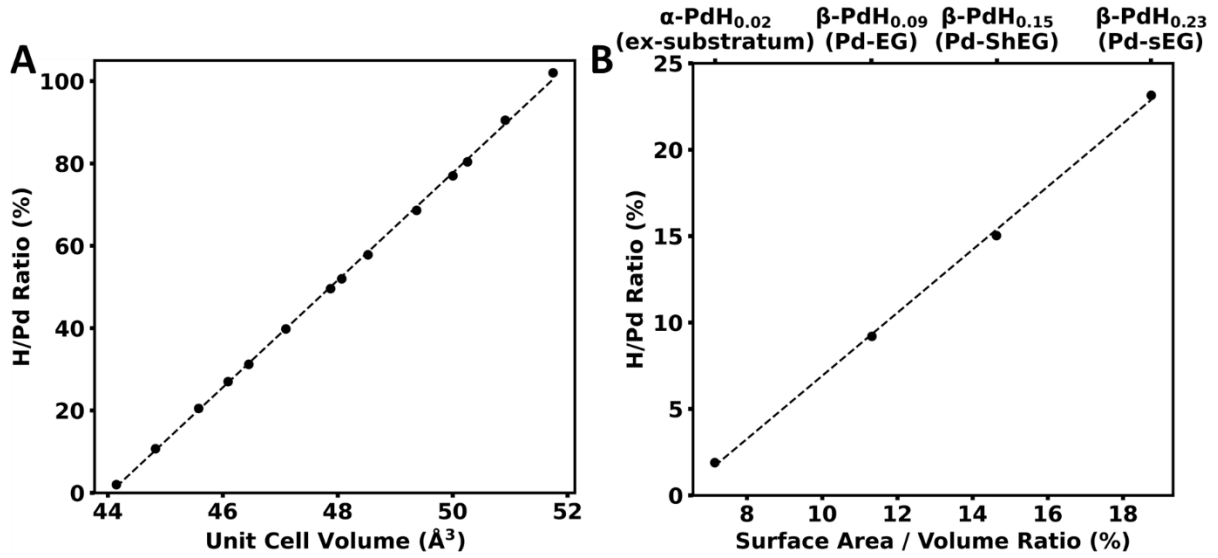

**Figure S6:** A) Comparison of PdHx H/Pd ratio and the hexagonal unit cell volume. The H/Pd ratios are given as a function of cubic lattice constant. Under the hexagonal convention, the H/Pd ratios can be replotted against unit cell volume. Using this new relationship, the H/Pd ratio of the palladium nanoparticles in this experiment can be calculated [1]. B) Comparison of the calculated PdHx H/Pd ratio and the surface area to volume ratio. The calculated H/Pd ratio is found to be proportional to the surface area to volume ratio.

[1] Hijazi, I.; Zhang, Y.; Fuller, R. A Simple Palladium Hydride Embedded Atom Method Potential for Hydrogen Energy Applications. *Journal of Energy Resources Technology, Transactions of the ASME* **2019**, *141*, doi:10.1115/1.4042405.

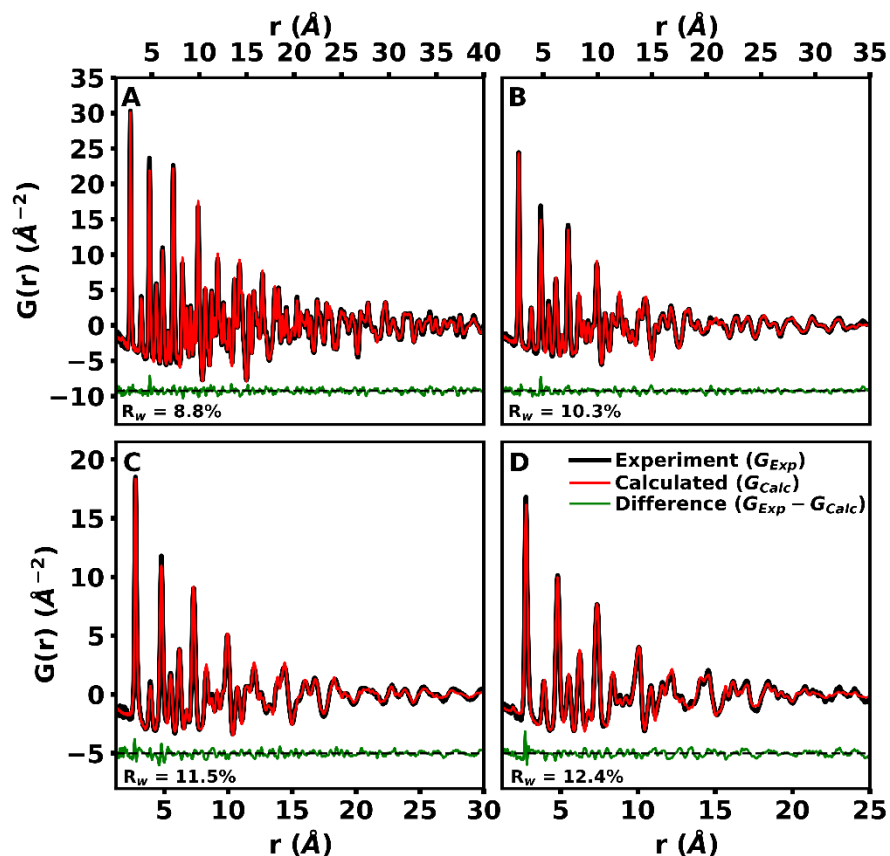

**Figure S7:** Experimental  $G(r)$ 's of the remaining Pd structures after subtraction of the substrates A) ex-substratum, B) EG, C) ShEG and D) sEG. The experimental  $G(r)$ 's are fit to the theoretical core-shell model using a nanocrystalline  $\text{PdH}_x$  pseudo-hexagonal core and a disordered  $\text{PdH}_x$  pseudo-hexagonal outer shell. The mean spherical diameter is refined to  $8.4 \pm 0.13$ ,  $5.6 \pm 0.12$ ,  $4.2 \pm 0.11$ ,  $3.5 \pm 0.09$  nm for ex-substratum, EG, ShEG and sEG, respectively.

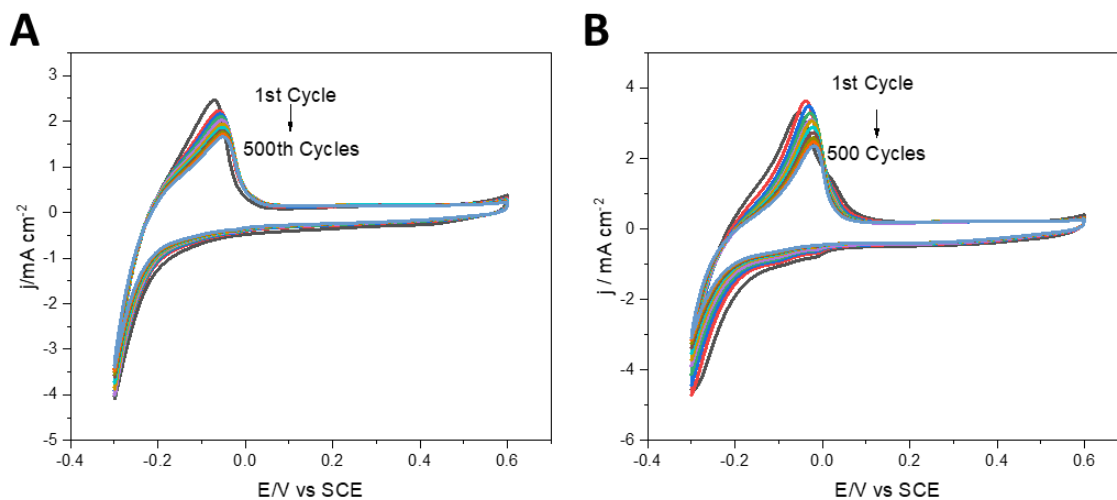

**Figure S8:** Stability testing of Pd functionalized nanocomposites A) Pd-ShEG and B) Pd-sEG conducted through repeated CV cycling.

**Table S1:** Capacitances of the graphene-based nanomaterials.

| Sample                             | Bare Electrode | EG   | ShEG -30 | ShEG -45 | ShEG -60 | ShEG -75 | sEG-10 | sEG -15 | sEG -20 | sEG -25 | sEG -30 |
|------------------------------------|----------------|------|----------|----------|----------|----------|--------|---------|---------|---------|---------|
| Capacitance (mF cm <sup>-2</sup> ) | 2.02           | 5.97 | 8.55     | 11.35    | 8.37     | 8.81     | 23.11  | 24.4    | 23.6    | 28.5    | 25.3    |

**Table S2:** EDX results showing the atomic percent of carbon, oxygen, and palladium of each material and nanocomposite.

| Material | Carbon | Oxygen | Palladium |
|----------|--------|--------|-----------|
| EG       | 81.8   | 18.2   | 0.0       |
| sEG      | 85.2   | 14.8   | 0.0       |
| ShEG     | 84.8   | 15.2   | 0.0       |
| Pd-EG    | 78.4   | 15.4   | 1.7       |
| Pd-sEG   | 81.6   | 16.4   | 2.0       |
| Pd-ShEG  | 79.1   | 18.9   | 2.1       |

**Table S3:** PdH<sub>x</sub> nanoparticle pseudo-hexagonal core-shell model parameters.

| Sample                       | x (H/Pd) | a <sub>H</sub> ,b <sub>H</sub> (Å) | c <sub>H</sub> (Å) | Mean Diameter (nm) |
|------------------------------|----------|------------------------------------|--------------------|--------------------|
| (*) α-PdH <sub>x</sub>       | 0.02     | 2.739                              | 6.805              | 8.4 ± 0.13         |
| (*) β-PdH <sub>x</sub> /EG   | 0.09     | 2.764                              | 6.765              | 5.6 ± 0.12         |
| (*) β-PdH <sub>x</sub> /SHEG | 0.15     | 2.785                              | 6.730              | 4.2 ± 0.11         |
| (*) β-PdH <sub>x</sub> /SEG  | 0.23     | 2.813                              | 6.691              | 3.5 ± 0.09         |
| (**) PdH <sub>x</sub>        | ...      | 2.762                              | 6.846              | ...                |

(\*) Core unit cells are strained along the cubic {111}<sub>c</sub> plane deformed in the  $\langle \bar{1}10 \rangle_c$  direction. Pseudo-hexagonal is used to describe the strained system with an  $\alpha$ ,  $\beta = 89.25^\circ$  and  $\gamma = 120^\circ$ .

(\*\*) Shell unit cell is pseudo-hexagonal with a  $\alpha$ ,  $\beta = 81.65^\circ$  and  $\gamma = 120^\circ$ .
